# Supplementary material
Source: publisher figshare collection journal article supplement (https://acs.figshare.com/ndownloader/files/4142950)

---

Supporting Information for Publication

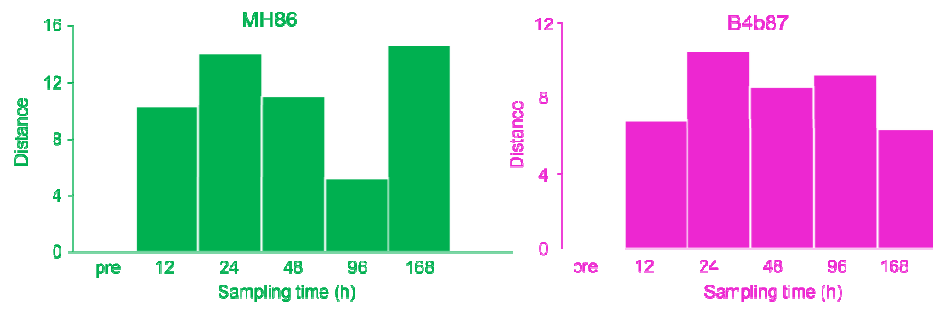

Fig. S1 Geometrical distance between *Bt*-transgenic and the corresponding control group on the trajectory plot (the length of the straight segment connecting the treated and control groups).

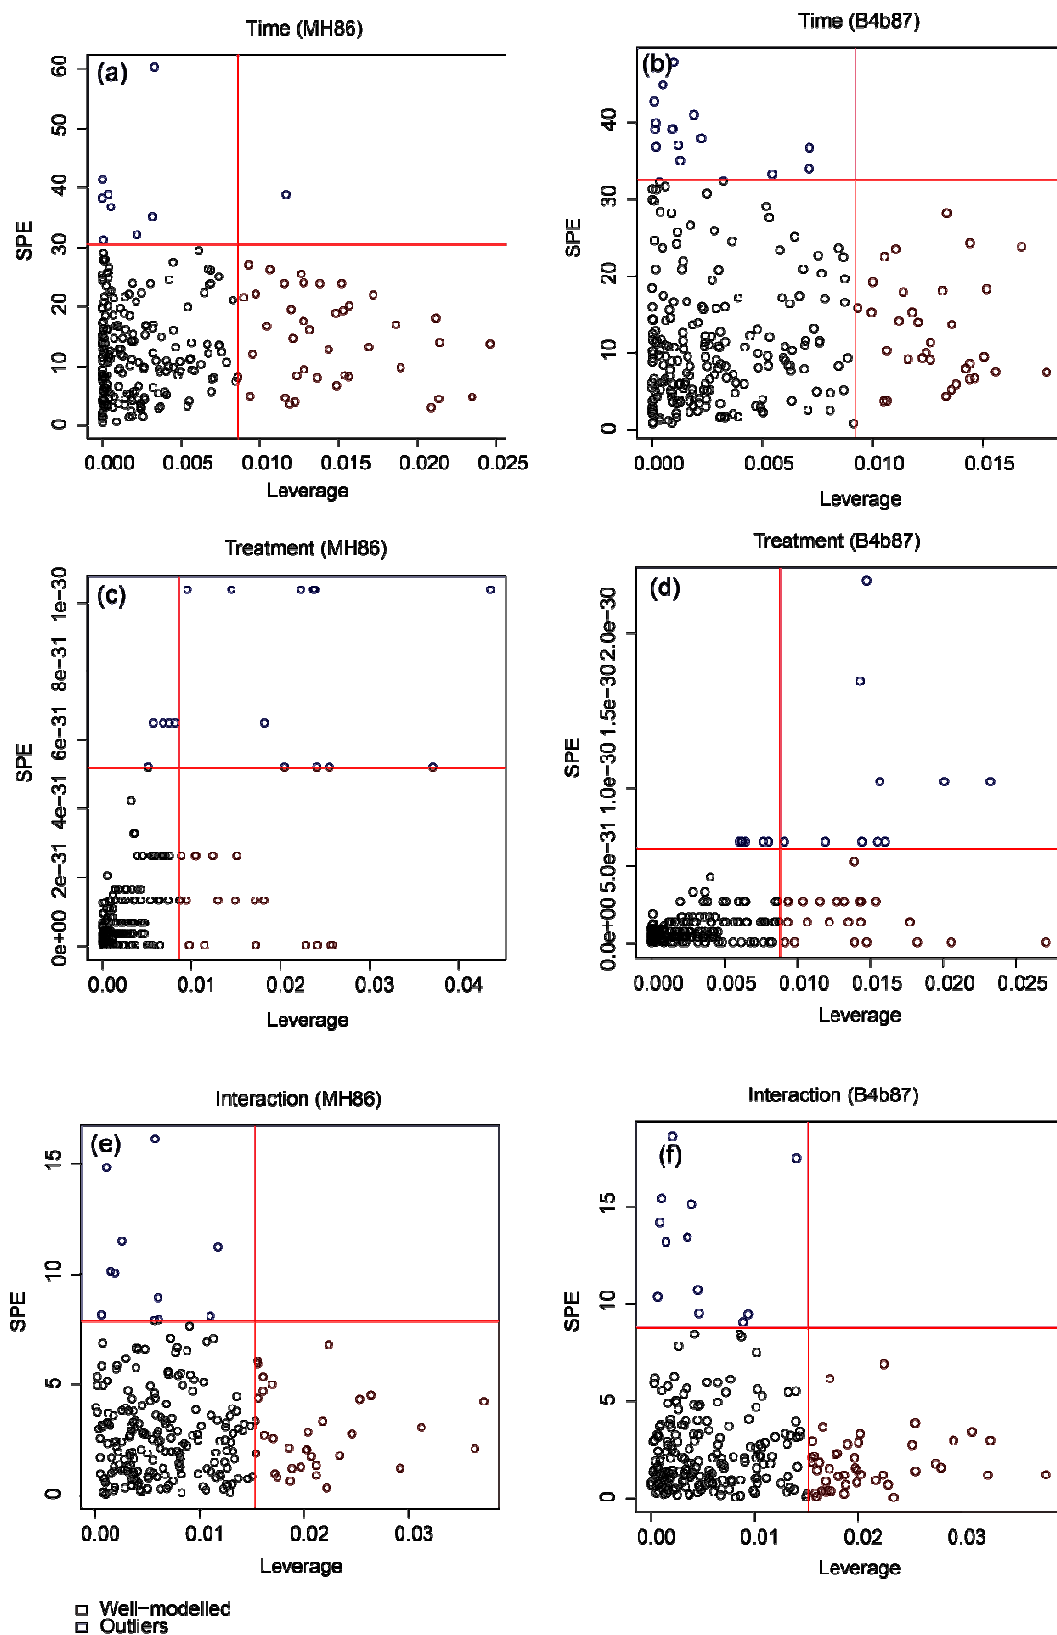

Fig. S2 Leverage/SPE plots for factor time (a and b), factor treatment (c and d) and their interactions (e and f).

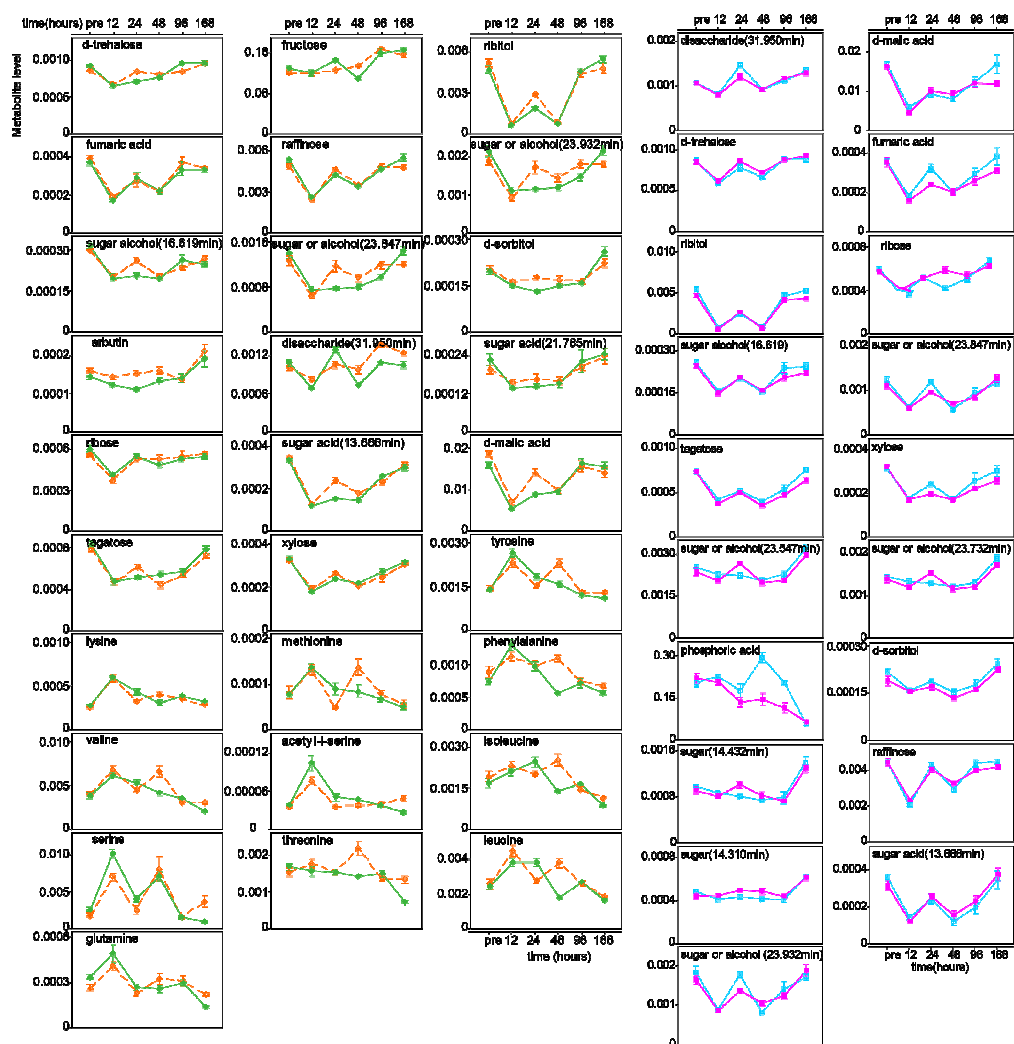

Fig. S3 Important metabolites affected by factor time. ◆: MH86 control, ◆: MH86 treated, ■: B4b87 control, ■: B4b87 treated.

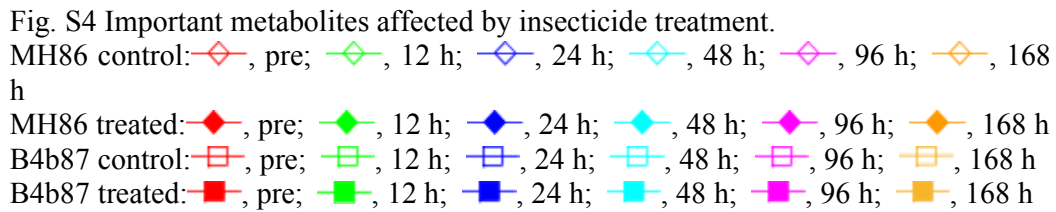

Supplement: Supplementary file 1 [file 4142950]
